# Supplementary material for: Glycan–protein interactions determine kinetics of N -glycan remodeling
Source: Royal Society of Chemistry journal article supplement (doi:10.1039/d1cb00019e), 2021-01-01
Supplement: d1cb00019e1.pdf [file d1cb00019e1.pdf]

**Supplementary to “Glycan-Protein Interactions Determine Kinetics  
of *N*-Glycan Remodeling”**

Corina Mathew<sup>1\*</sup>, R. Gregor Weiß<sup>2\*</sup>, Christoph Giese<sup>3</sup>, Chia-wei Lin<sup>1,4</sup>, Marie-Estelle Losfeld<sup>1</sup>,  
Rudi Glockshuber<sup>3</sup>, Sereina Riniker<sup>2</sup> and Markus Aebi<sup>1</sup>

\* shared first author

## Table of Contents

|                                           |           |
|-------------------------------------------|-----------|
| <b>1. Supplementary Methods</b>           | <b>1</b>  |
| Initial Seeding                           | 1         |
| Box Size Optimization                     | 1         |
| Branched GM I Reaction Mechanism          | 2         |
| Freezing of PDI                           | 2         |
| Purification of Glycan Processing Enzymes | 3         |
| <br>                                      |           |
| <b>2. Supplementary Figures</b>           | <b>4</b>  |
| Figure S1                                 | 4         |
| Figure S2                                 | 5         |
| Figure S3                                 | 6         |
| Figure S4                                 | 7         |
| Figure S5                                 | 8         |
| Figure S6                                 | 11        |
| Figure S7                                 | 11        |
| Figure S8                                 | 12        |
| Figure S9                                 | 13        |
| Figure S10                                | 14        |
| Figure S11                                | 15        |
| <br>                                      |           |
| <b>3. Supplementary Tables</b>            | <b>16</b> |
| Table S1                                  | 16        |
| Table S2                                  | 16        |
| Table S3                                  | 16        |
| Table S4                                  | 17        |
| Table S5                                  | 17        |
| Table S6                                  | 17        |
| Table S7                                  | 18        |
| Table S8                                  | 18        |
| Table S9                                  | 19        |
| Table S10                                 | 19        |
| Table S11                                 | 19        |
| <br>                                      |           |
| <b>4. References</b>                      | <b>22</b> |

## 1. Supplementary Methods

### Initial Seeding

To generate a diverse set of starting configurations, an initial enhanced sampling protocol was performed with GROMACS 5.1.4 [1] using PLUMED 2.3 [2]. The replica exchange with solute tempering (REST2) [3] scheme was employed for the PDI protein with sites 1 – 4 glycosylated. A cubic box with an edge length of 16 nm with 132'000 solvent molecules including 42 sodium ions was used. To avoid spurious artifacts that have been identified in charged simulation boxes with PME long-range electrostatics [4], the protein and ion electrostatic interactions were scaled together, such that the total charge of the setup was zero in all replicas. The effective replica temperatures ranged from  $T_{\min} = 300 \text{ K}$  to  $T_{\max} = 400 \text{ K}$  in  $n = 30$  steps with intermediate temperatures determined by the replica number  $i$  using

$T_i = T_{\min} \exp(i \cdot \ln(T_{\max}/T_{\min})/(n - 1))$ . First, the separate replicas were equilibrated for 1 ns at the respective replica's temperature. Afterwards, the replica exchange protocol was applied with exchange attempts every 20 ps over a total run time of 100 ns.

### Box Size Optimization

After the enhanced conformational sampling with REST2, the optimized box size was determined using the near-densest-lattice-packing (NDLP) algorithm [5]. The algorithm utilizes the REST2 sampled structures to render a triclinic box such that the minimum distance between periodic images (of each input structures) is at least 3.5 nm. The conservative choice of 3.5 nm minimum distance is far beyond twice the cutoff range and presents a compromise between the number of solvent molecules and the hydrodynamic interactions across periodic boundaries. The resulting triclinic box consisted of 63'000 water molecules, 42 ions, and the glycoprotein.

For the second setup with only the a'-domain, the box lengths were manually set to  $6.35 \text{ nm} \times 6.35 \text{ nm} \times 9.5 \text{ nm}$ . The glycosylation site 5 was aligned along the longer  $Z$  box edge. In the case of this rectangular, elongated box, the pressure coupling was applied semi-anisotropically, i.e. the  $x$  and  $y$  directions were coupled to a different barostat than the  $Z$  direction.

For both setups, the translational and rotational velocity of the center of mass was removed every 100 steps. The subsequent production runs were performed with the GROMACS-2018-rtc [1] branch available on <http://github.com/Tsjerk/gromacs/tree/rtc2018>.

### **Branched GM I Reaction Mechanism**

To account for the apparent biphasic formation of  $\text{Man}_5\text{GlcNAc}_2$  we extended the consecutive mechanism (figure 4A) by assuming the formation of two different  $\text{Man}_6\text{GlcNAc}_2$  isoforms and therefore adding a branch point after  $\text{Man}_7\text{GlcNAc}_2$ . This resulted in two additional apparent rate constants  $k_3^*$  and  $k_4^*$  accounting for formation and disappearance of the postulated, second  $\text{Man}_6\text{GlcNAc}_2$  isomer (figure S9A). In comparison to the simpler, unbranched consecutive mechanism from above (figure 4A), the fits obtained using this branched mechanism were clearly improved (in particular with respect to the kinetics of  $\text{Man}_6\text{GlcNAc}_2/\text{Man}_6\text{GlcNAc}_2^*$  and  $\text{Man}_5\text{GlcNAc}_2$  glycoform formation at site 1, 2, 3 and 5), indicating that processing of  $\text{Man}_9\text{GlcNAc}_2$  by GM I could indeed proceed via a mechanism that involved more than just one  $\text{Man}_6\text{GlcNAc}_2$  isomer (figure S9B). However, our analytical methods do not discriminate between different glycan isomers. Therefore, inclusion of the additional rate constants  $k_3^*$  and  $k_4^*$  in the analysis resulted in an underdetermined system, as most obvious in case of  $k_4^*$  of site 1 and 3 (table S5) and precluded a more thorough analysis. For site 4,  $\text{Man}_5\text{GlcNAc}_2$  formation was too slow to observe two phases. Expectedly, fitting the site 4 data according to the branched mechanism did not show an improvement compared to using the unbranched one.

### **Freezing of PDI**

To determine if freezing, storage and thawing of PDI would have an influence on the site-specific processing of its *N*-glycans, *in vitro* assays with GM I were performed. Therefore, PDI was either used freshly after purification, after being flash-frozen and immediately thawed and after being flash-frozen and stored for ten days. Figure S10 shows that no differences in site-specific processing occurred after freezing, storage and thawing of PDI.

### **Purification of Glycan Processing Enzymes**

Both, the substrate of the *in vitro* assays PDI and the glycan processing enzymes ER Man I, GM I and GnT I were produced in High-Five<sup>TM</sup> cells using the insect cell/baculovirus system [6]. PDI was retained in the ER and purified like described before [7]. The glycan processing enzymes were secreted and purified from the supernatant *via* their His-tag (figure S11).

## 2. Supplementary Figures

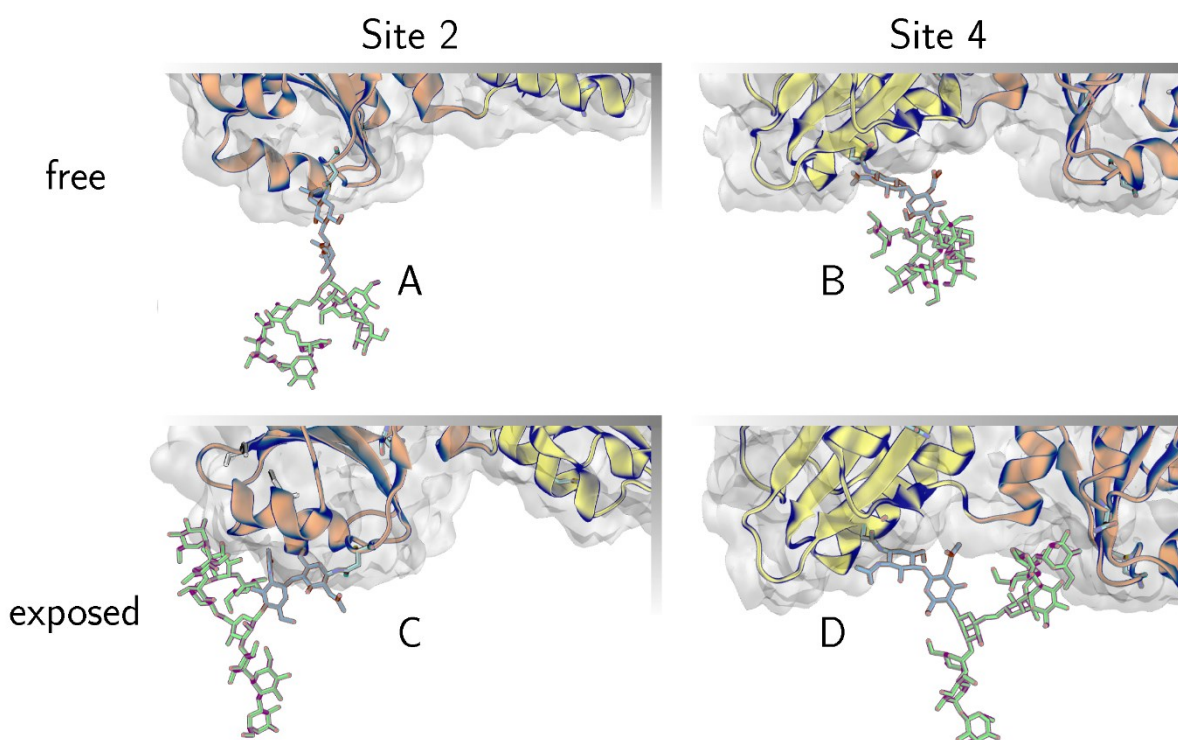

**Figure S1: Convex and concave protein surface on sites 2 and 4**

The convex and concave protein surface at sites 2 and 4 represent different glycan accessibility.

**A:** The positive curvature of the protein surface at site 2 allows extended branch conformations if the whole glycan is classified as 'free'.

**B:** In contrast, the glycan at site 4 is confined by the concave protein surface environment, such that even 'free' conformations are still dominated by collapsed conformations. Hence, at site 4 the steric hindrance of a concave protein surface diminishes the accessible space for 'free & exposed' glycan conformations

**C:** Extended branch conformations are particularly 'exposed' at site 2 even if the glycan is in 'contact'.

**D:** While at site 4 individually 'exposed' branches are still relatively buried inside the concave protein environment if the glycan is in 'contact' with the protein surface.

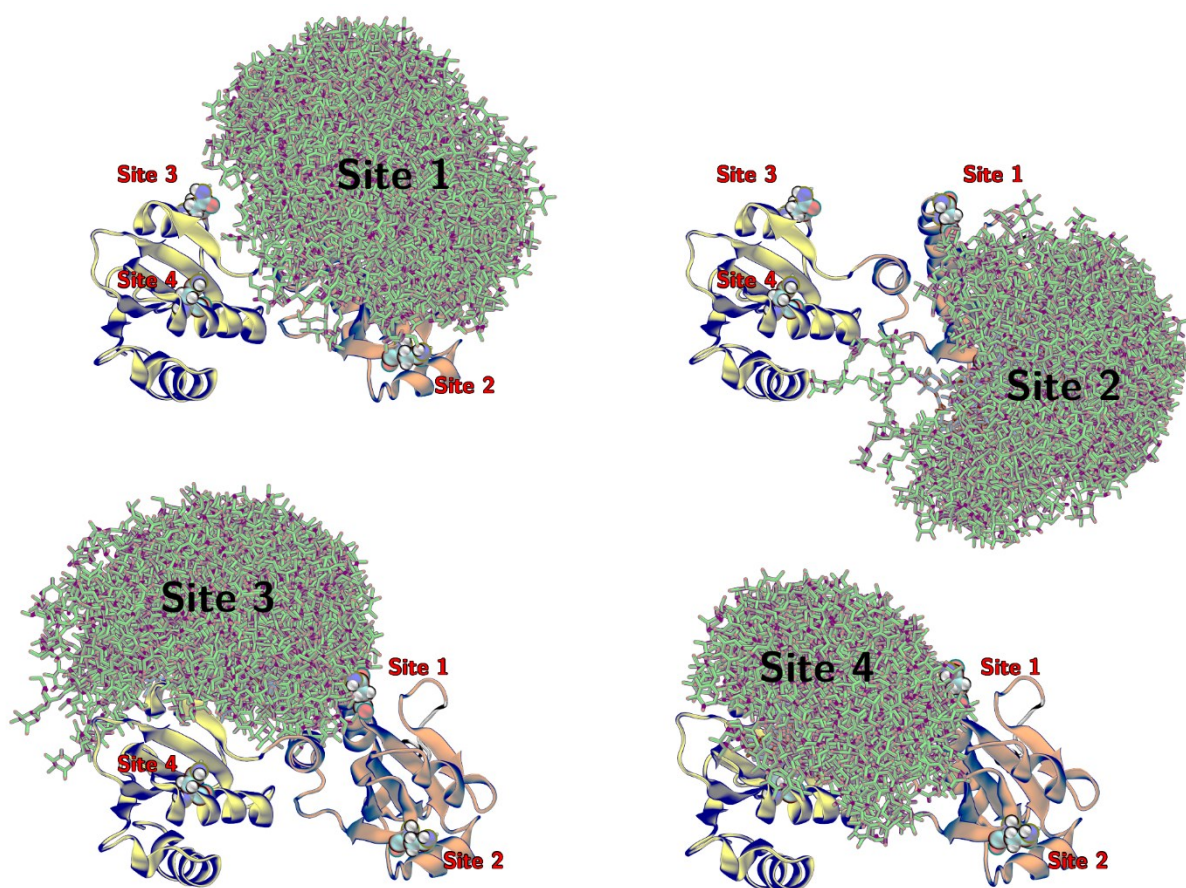

**Figure S2: Site-specific *N*-glycan ensemble from simulations**

A ribbon representation of the a- and b-domain with the ensembles of glycan conformations for sites 1-4. A random choice of 175 frames are used to illustrate the *N*-glycan ensemble on each site, respectively. The underlying protein domains are taken from one frame. Note that the a- and b-domain are flexibly connected. Hence, the respectively neighbouring domain also dominantly varies in its relative position to a given glycan ensemble.

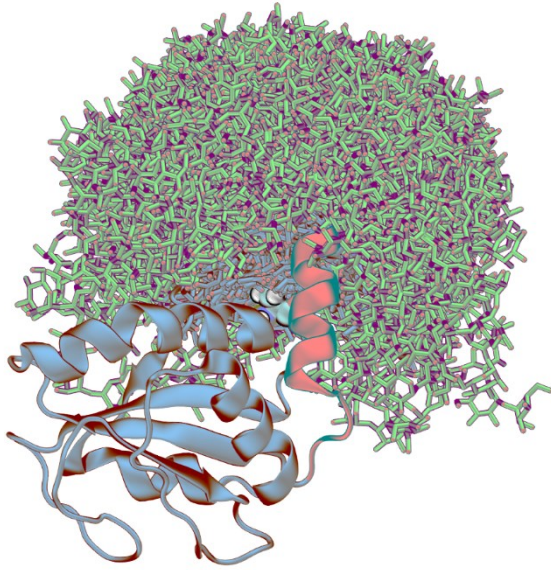

**Figure S3: N-glycan ensemble on site 5 from simulations**

The ensemble of the glycan on site 5 is represented by 175 random frames from simulations. The  $\alpha$ '-domain is represented by a single simulation frame. Note, that the C-terminal helix overlaps with the ensemble. This helix is particularly flexible itself and interacts with the glycan in various conformations.



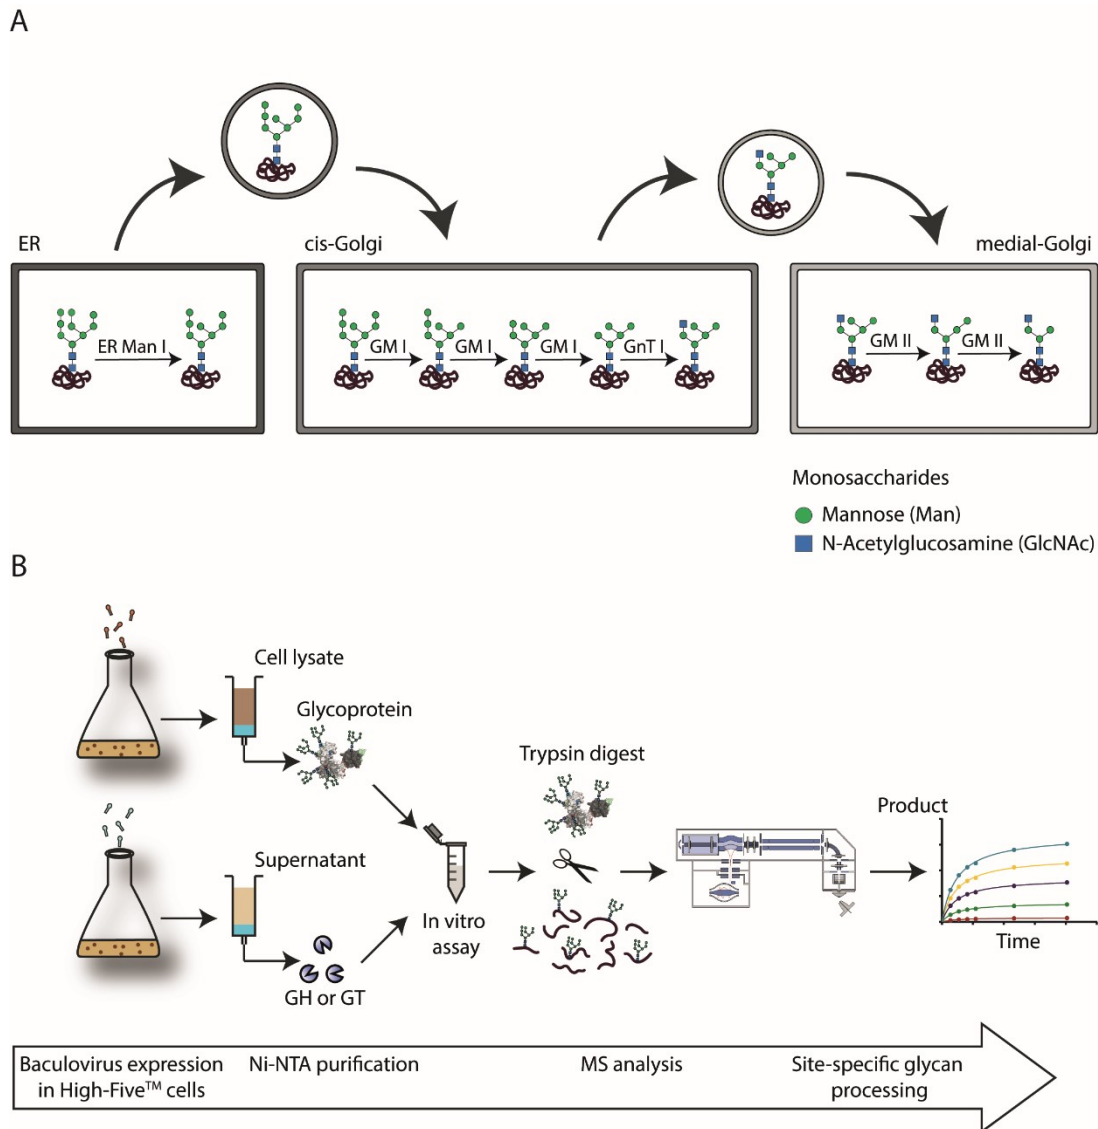

**Figure S4: N-glycan processing *in vivo* and *in vitro***

**A:** Simplified representation of the N-glycan processing steps in mammalian cells. Shown are only the reactions relevant to this study, catalyzed by ER Man I, GM I, GnT I and GM II. Vesicles transport the processed glycoproteins between the different compartments (ER, cis-Golgi and medial-Golgi). This transport defines the time glycoproteins are exposed to the respective glycan-processing enzymes.

**B:** Workflow of *in vitro* assays to study site-directed glycan processing. The model protein PDI and different glycan processing enzymes, glycosylhydrolases (GH) and a glycosyltransferase (GT), were produced in High-Five™ cells using the Baculovirus expression system. PDI was retained in the ER of the cells and therefore purified from the cell lysate. Glycan-processing enzymes were secreted and therefore purified from the supernatant with metal chelate (Ni-NTA) affinity chromatography. For the *in vitro* assay PDI and the respective enzymes were incubated, and the reactions were stopped by TCA

precipitation after different incubation times. Tryptic glycopeptides were analyzed by MS and product formation over time was quantified individually for each site.

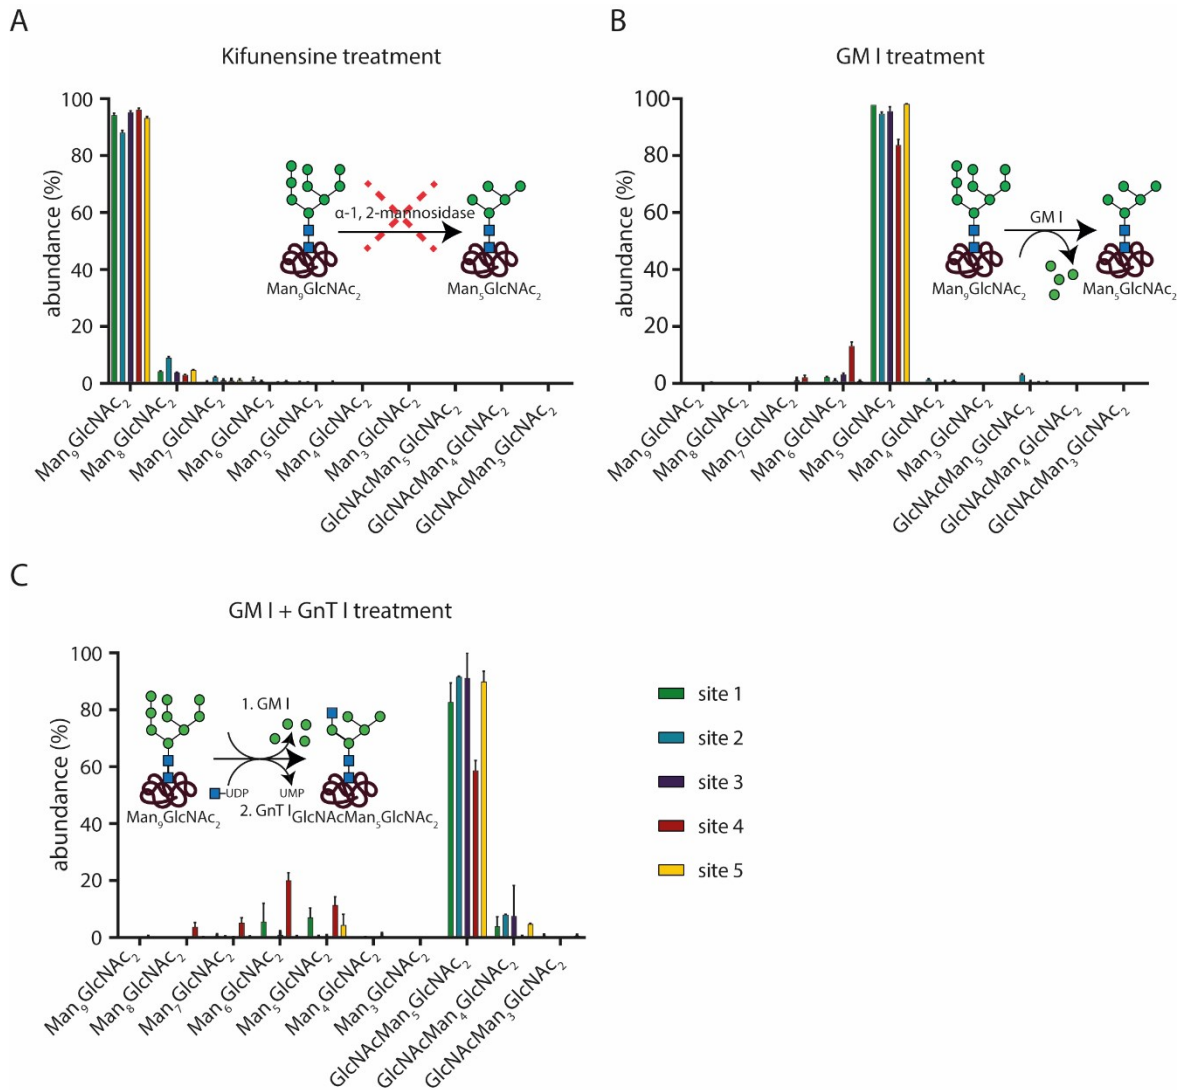

**Figure S5: Generation of the PDI glycosubstrate for different glycan processing enzyme *in vitro* assays**

The four different glycan processing enzymes used in the *in vitro* assays require different glycosubstrates. PDI was therefore treated according to these requirements ( $n=3$ ).

**A:** Substrate production for ER Man I and GM I *in vitro* assays. During PDI production in High-Five™ cells, the  $\alpha$ -1, 2-mannosidase inhibitor kifunensine was added to the culture. It prevented mannose trimming in the ER and cis-Golgi. PDI purified from cells treated with kifunensine therefore showed a homogenous glycoform distribution (mainly  $Man_9GlcNAc_2$  on all sites).

**B:** Substrate production for GnT I *in vitro* assay. Purified PDI produced by High-Five™ cells not treated with kifunensine was incubated over night with GM I. Naturally occurring site-specific differences in glycoform distribution were adjusted by the mannose trimming activity of GM I, resulting in mainly Man<sub>5</sub>GlcNAc<sub>2</sub> (the substrate of GnT I) on all sites.

**C:** Substrate production for GM II *in vitro* assay. Purified PDI produced by High-Five™ cells not treated with kifunensine was incubated with GM I. After buffer exchange to GnT I activity buffer, PDI mainly bearing Man<sub>5</sub>GlcNAc<sub>2</sub> on all sites was incubated with GnT I to obtain the glyco-substrate of GM II, GlcNAcMan<sub>5</sub>GlcNAc<sub>2</sub>.

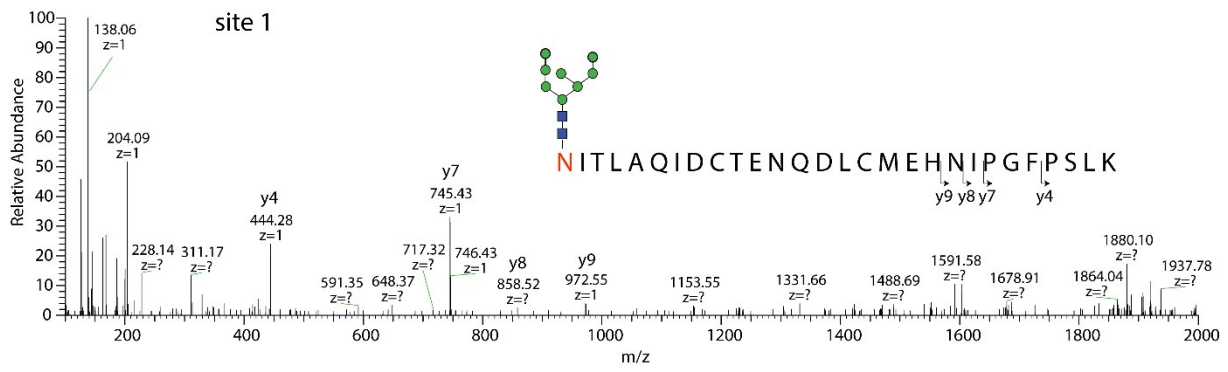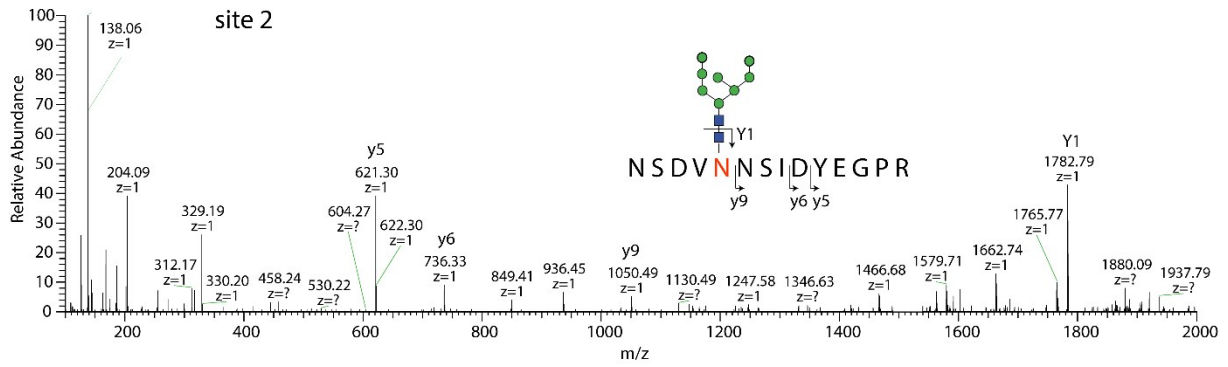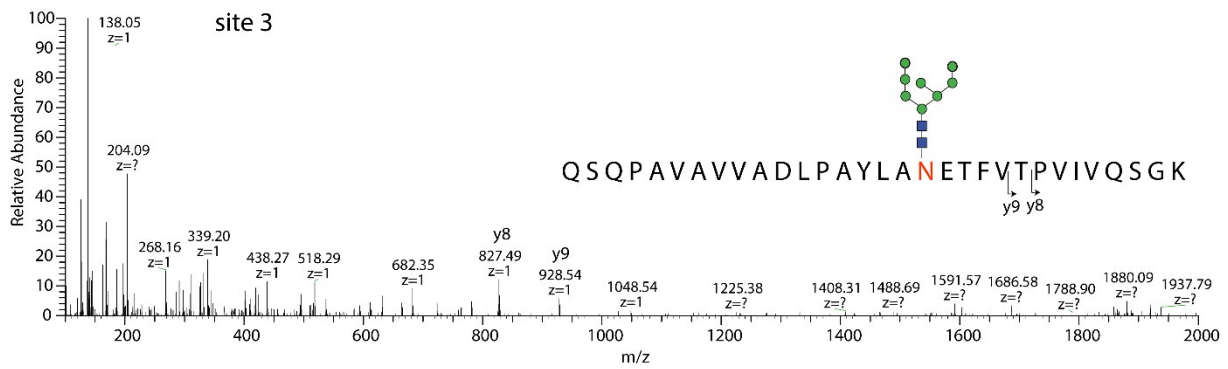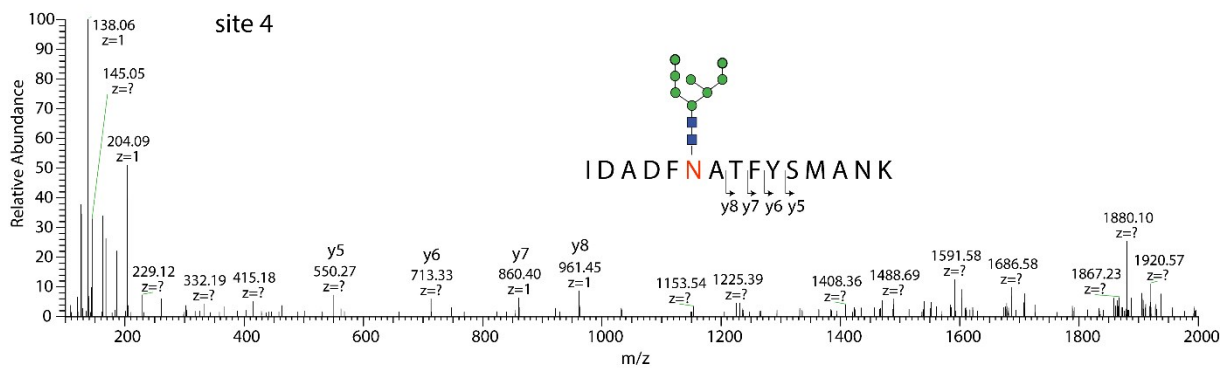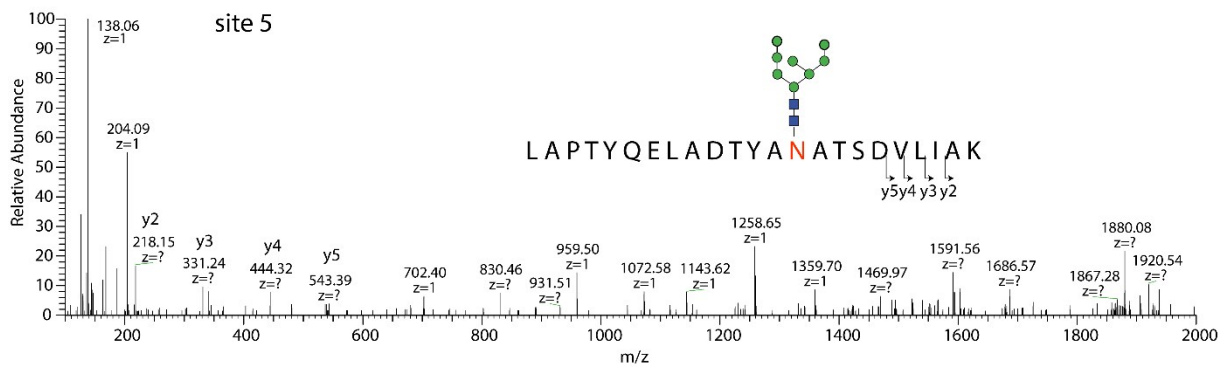

### Figure S6: MS/MS spectra of the five PDI N-glycosylation sites

The five panels show the MS/MS spectra of five different tryptic PDI peptides. Each peptide contains one N-glycosylation sites with a  $\text{Man}_8\text{GlcNAc}_2$  glycan attached to the asparagine residue in the Asn-X-Ser/Thr N-glycosylation sequon (marked in red). HCD MS/MS spectra were performed with a target value of  $5e^5$  by the collision energy setup at a normalized collision energy 40.

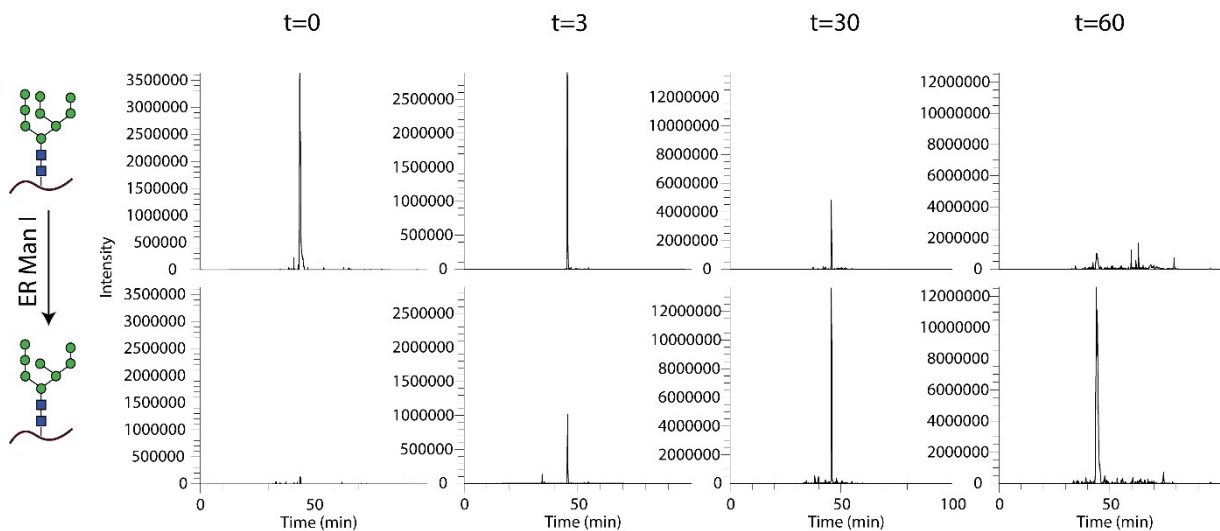

### Figure S7: XIC of site 4 *in vitro* processing by ER Man I

PDI purified from kifunensine treated cells was incubated with ER Man I. Shown are the extracted ion chromatograms (XIC) of the site 4 PDI glycopeptide at different time points. The top panel shows the decrease of  $\text{Man}_9\text{GlcNAc}_2$  while the lower panel shows the respective increase in  $\text{Man}_8\text{GlcNAc}_2$ .

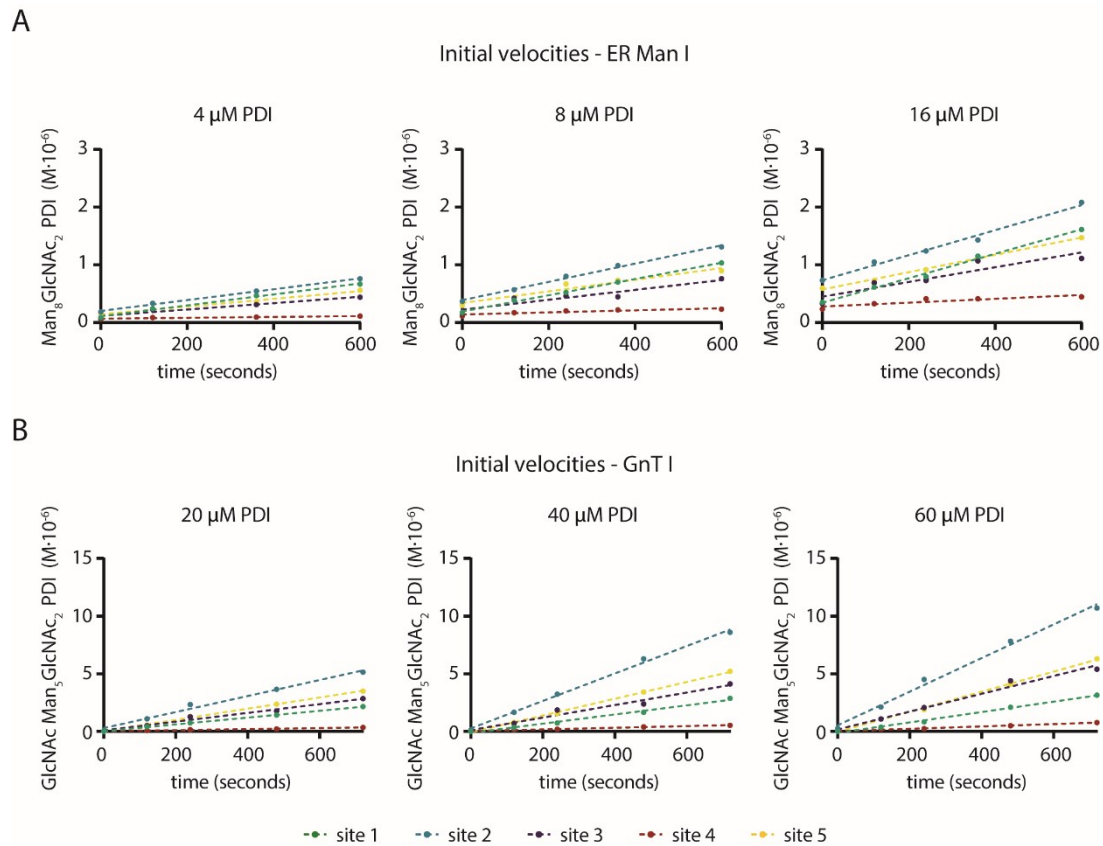

**Figure S8: Linear phase of reaction for ER Man I and GnT I at different initial concentrations of PDI**

**A:** ER Man I: The substrate  $\text{Man}_9\text{GlcNAc}_2\text{-PDI}$  (4, 8 and 16  $\mu\text{M}$ ) was incubated in presence of 0.6 nM ER Man I. The generation of the product  $\text{Man}_8\text{GlcNAc}_2$  (in  $10^{-6}$  M) on the five different sites is plotted against the incubation time ( $n=1$ ). Linear regression lines were fitted using GraphPad Prism software.

**B:** GnT I: The substrate  $\text{Man}_5\text{GlcNAc}_2\text{-PDI}$  (20, 40 and 60  $\mu\text{M}$ ) was incubated in presence of 67 nM GnT I and 5 mM UDP-GlcNAc. The generation of the product  $\text{GlcNAcMan}_5\text{GlcNAc}_2$  (in  $10^{-6}$  M) on the five different sites is plotted against the incubation time ( $n=1$ ).

A

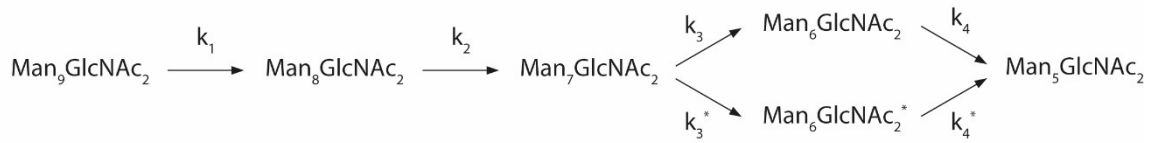

B

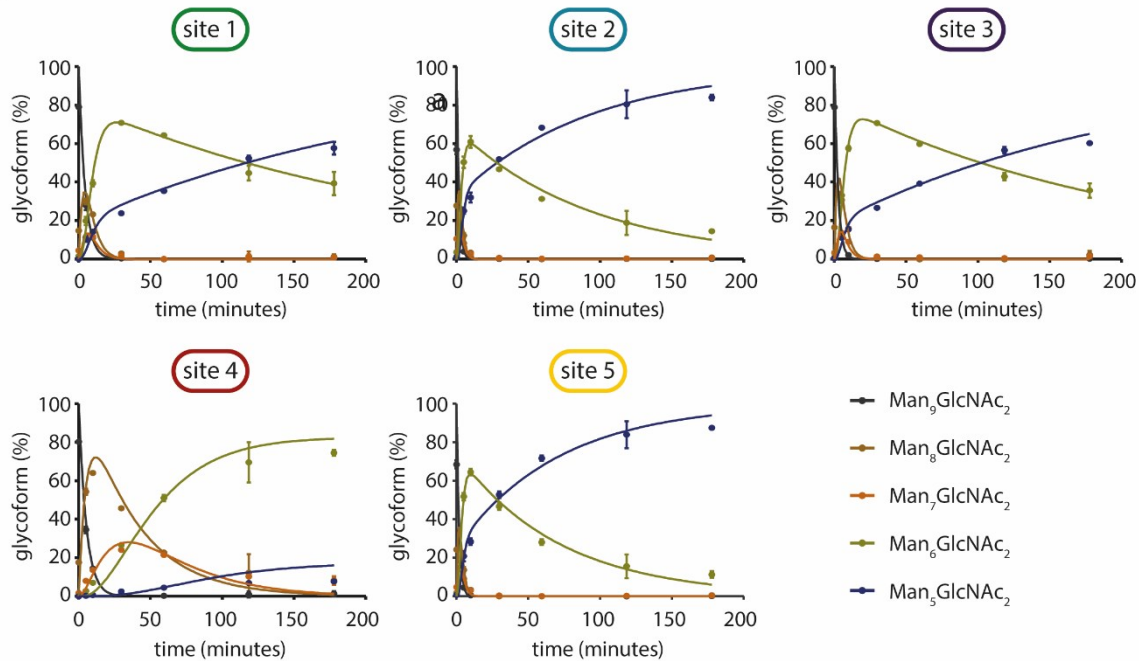

**Figure S9: Site-specific processing of PDI-Man<sub>9</sub>GlcNAc<sub>2</sub> by GM I**

**A:** Consecutive mechanism for the stepwise removal of terminal mannoses from the Man<sub>9</sub>GlcNAc<sub>2</sub> glycans of PDI, assuming a branch point after Man<sub>7</sub>GlcNAc<sub>2</sub> and formation of two different Man<sub>6</sub>GlcNAc<sub>2</sub> isomers. Conversion of the Man<sub>9</sub>GlcNAc<sub>2</sub> to Man<sub>8</sub>GlcNAc<sub>2</sub>, Man<sub>8</sub>GlcNAc<sub>2</sub> to Man<sub>7</sub>GlcNAc<sub>2</sub>, Man<sub>7</sub>GlcNAc<sub>2</sub> to Man<sub>6</sub> /Man<sub>6</sub>\*GlcNAc<sub>2</sub>, and Man<sub>6</sub> /Man<sub>6</sub>\*GlcNAc<sub>2</sub> to the Man<sub>5</sub>GlcNAc<sub>2</sub> glycoform is described by apparent rate constants  $k_1$ ,  $k_2$ ,  $k_3$ ,  $k_3^*$ ,  $k_4$  and  $k_4^*$ .

**B:** Kinetics of glycan processing for each of the five glycosylation sites of PDI measured at 37 °C and pH 7. Initial concentrations were 20 μM PDI-Man<sub>9</sub>GlcNAc<sub>2</sub> and 0.1 μM GM I ( $n=3$ ). Solid lines represent a global fit of the data from each glycosylation site according to the mechanism in (A).

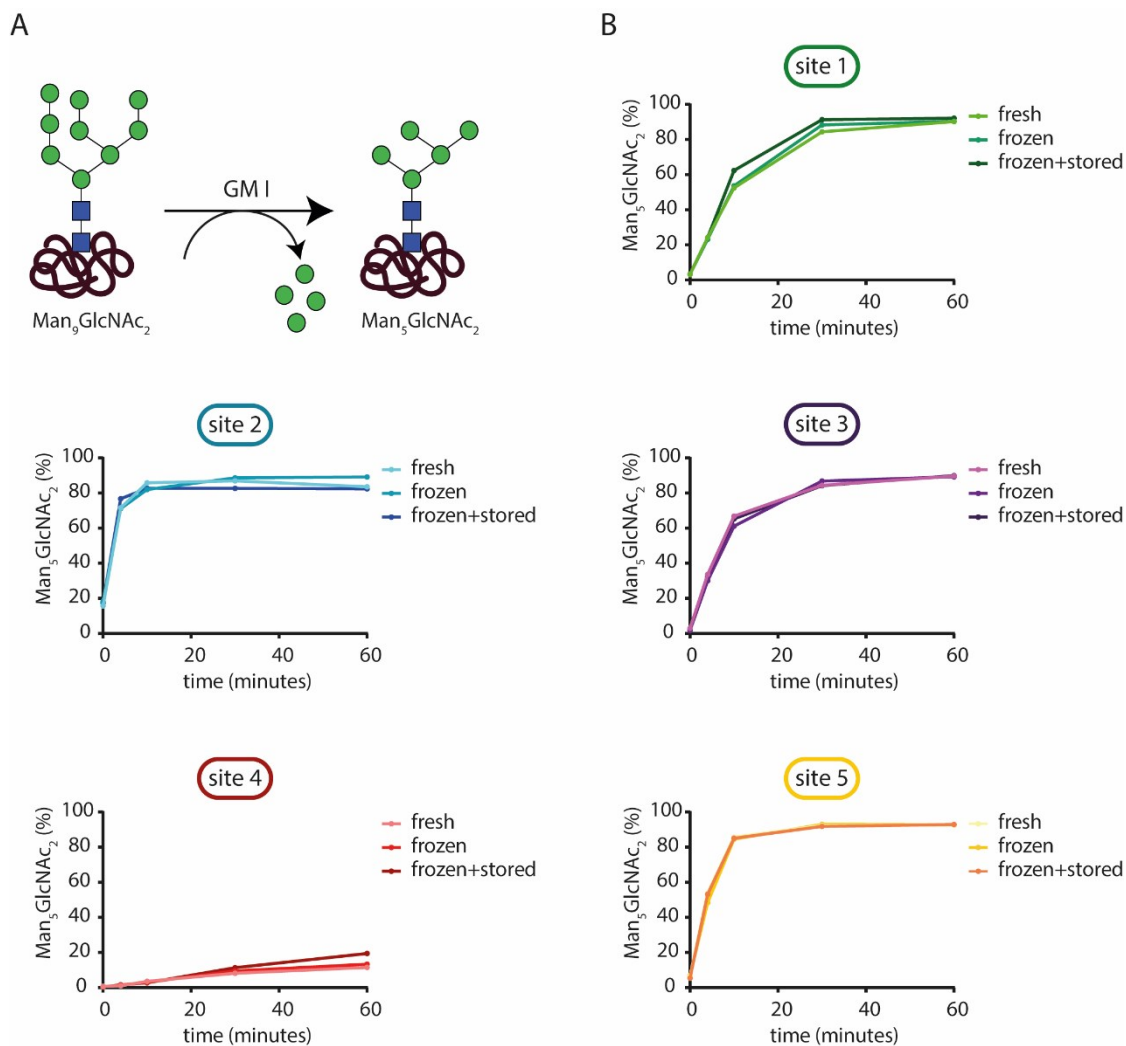

**Figure S10: Site-specific processing of frozen PDI**

**A:** Reaction catalyzed by GM I: Removal of four  $\alpha$ -1, 2-linked mannoses from  $\text{Man}_9\text{GlcNAc}_2$  glycan attached to PDI resulting in  $\text{Man}_5\text{GlcNAc}_2$ .

**B:** After Ni-NTA purification, PDI was buffer exchanged to GM I activity buffer and either used immediately for a GM I *in vitro* assay, flash frozen in liquid nitrogen, thawed and used for the assay or flash frozen and stored for ten days and then used for the assay. Shown is the conversion of  $\text{Man}_9\text{GlcNAc}_2$  to  $\text{Man}_5\text{GlcNAc}_2$  on each site over 60 minutes. Samples were taken at indicated time points ( $n=1$ ).



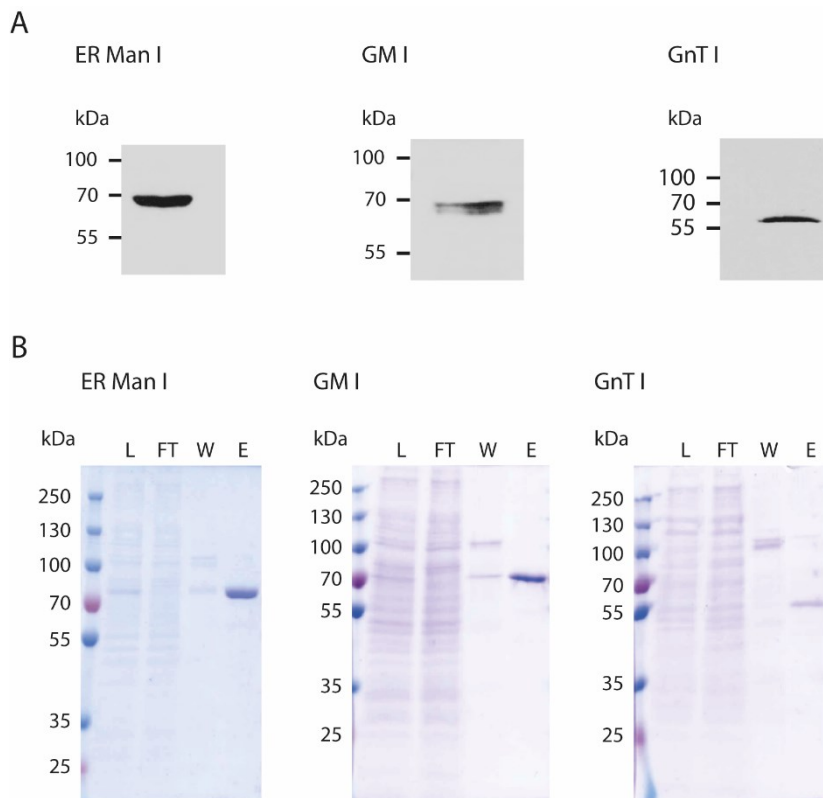

**Figure S11: Production and purification of glycan processing enzymes**

**A:** Supernatant of High-Five<sup>TM</sup> cell culture infected with baculovirus encoding for ER Man I, GM I or GnT I respectively was probed with an anti-His antibody and subsequently with an anti-mouse HRP-conjugated antibody. The immunoblot shows expression and secretion of the glycan processing enzymes encoded by the three different baculovirus stocks.

**B:** The different steps of Ni-NTA purification of three different glycan processing enzymes (ER Man I, GM I and GnT I) were analyzed by SDS-PAGE. The gels show Load (L) which is the supernatant of a baculovirus infected High-Five<sup>TM</sup> cell culture, Flow Through (FT) which is material not binding to the Ni-NTA beads, Wash (W) which is material unspecifically bound to Ni-NTA beads and washed off with washing buffer and Elution (E) which is the glycan processing enzyme of interest which specifically binds *via* its His-tag to the Ni-NTA beads and can be eluted by the addition of the elution buffer.

### 3. Supplementary Tables

**Table S1. Glycosite occupancy of PDI produced in High-Five™ cells using the insect cell/baculovirus system.**

| Site | Sequence                                   | m/z                     | Peak area   | Site occupancy |
|------|--------------------------------------------|-------------------------|-------------|----------------|
| 1    | NITLAQIDCTENQDLCMEHNIPGFPSLK               | 1086.8429 <sup>3+</sup> | 15518895646 | 66.2%          |
|      | NITLAQIDCTENQDLCMEHNIPGFPSLK<br>+ HexNAc   | 1154.5364 <sup>3+</sup> | 30400801778 |                |
| 2    | NSDVNNSIDYEGPR                             | 790.3498 <sup>2+</sup>  | 61943778262 | 60.7%          |
|      | NSDVNNSIDYEGPR + HexNAc                    | 891.8904 <sup>2+</sup>  | 95964490971 |                |
| 3    | QSQPAVAVVADLPAYLANETVTPVIVQSGK             | 1071.5837 <sup>3+</sup> | 17604299292 | 71.2%          |
|      | QSQPAVAVVADLPAYLANETVTPVIVQSGK<br>+ HexNAc | 1139.2675 <sup>3+</sup> | 43465051276 |                |
| 4    | IDADFNATFYSMANK                            | 854.3875 <sup>2+</sup>  | 2.07751E+11 | 78.2%          |
|      | IDADFNATFYSMANK + HexNAc                   | 955.9257 <sup>2+</sup>  | 51943606640 |                |
| 5    | LAPTYQELADTYANATSDVLIK                     | 1234.635 <sup>2+</sup>  | 51943606640 | 65.8%          |
|      | LAPTYQELADTYANATSDVLIK + HexNAc            | 1336.1693 <sup>2+</sup> | 1.00148E+11 |                |

**Table S2. Site-specific initial ER Man I velocities (in 10<sup>-9</sup> M/s ± SEM) for different substrate (PDI) concentrations.**

|           | site 1      | site 2      | site 3      | site 4      | site 5      |
|-----------|-------------|-------------|-------------|-------------|-------------|
| 4 μM PDI  | 0.95 ± 0.05 | 0.94 ± 0.04 | 0.55 ± 0.08 | 0.08 ± 0.02 | 0.67 ± 0.04 |
| 8 μM PDI  | 1.41 ± 0.04 | 1.58 ± 0.07 | 0.85 ± 0.18 | 0.18 ± 0.05 | 1.01 ± 0.14 |
| 16 μM PDI | 2.12 ± 0.09 | 2.17 ± 0.14 | 1.28 ± 0.31 | 0.33 ± 0.1  | 1.5 ± 0.1   |

**Table S3. Site-specific initial GnT I velocities (in 10<sup>-9</sup> M/s ± SEM) for different substrate (PDI) concentrations.**

|           | site 1      | site 2       | site 3      | site 4      | site 5      |
|-----------|-------------|--------------|-------------|-------------|-------------|
| 20 μM PDI | 2.95 ± 0.04 | 6.94 ± 0.46  | 3.80 ± 0.32 | 0.45 ± 0.05 | 4.9 ± 0.1   |
| 40 μM PDI | 3.98 ± 0.25 | 11.9 ± 0.44  | 5.43 ± 0.57 | 0.72 ± 0.06 | 7.26 ± 0.16 |
| 60 μM PDI | 4.5 ± 0.2   | 14.57 ± 0.72 | 7.72 ± 0.64 | 1.03 ± 0.07 | 8.69 ± 0.21 |

**Table S4.** Apparent rate constants  $k_1$ ,  $k_2$ ,  $k_3$  and  $k_4$  for formation of the  $\text{Man}_8\text{GlcNAc}_2$ ,  $\text{Man}_7\text{GlcNAc}_2$ ,  $\text{Man}_6\text{GlcNAc}_2$  and  $\text{Man}_5\text{GlcNAc}_2$  glycoforms by GM I on each glycosylation site, respectively.

|                             | site 1                        | site 2                        | site 3                        | site 4                        | site 5                        |
|-----------------------------|-------------------------------|-------------------------------|-------------------------------|-------------------------------|-------------------------------|
| $k_1$ ( $\text{min}^{-1}$ ) | $0.21 \pm 0.03$               | $0.43 \pm 0.18$               | $0.37 \pm 0.08$               | $0.19 \pm 0.02$               | $0.45 \pm 0.16$               |
| $k_2$ ( $\text{min}^{-1}$ ) | $0.22 \pm 0.04$               | $0.57 \pm 0.28$               | $0.26 \pm 0.05$               | $(2.7 \pm 0.3) \cdot 10^{-2}$ | $0.55 \pm 0.21$               |
| $k_3$ ( $\text{min}^{-1}$ ) | $0.45 \pm 0.16$               | $1.10 \pm 1.0$                | $0.59 \pm 0.20$               | $(4.1 \pm 0.7) \cdot 10^{-2}$ | $1.10 \pm 0.7$                |
| $k_4$ ( $\text{min}^{-1}$ ) | $(7.0 \pm 0.7) \cdot 10^{-3}$ | $(2.4 \pm 0.4) \cdot 10^{-2}$ | $(7.6 \pm 0.7) \cdot 10^{-3}$ | $(1.7 \pm 0.4) \cdot 10^{-3}$ | $(2.7 \pm 0.4) \cdot 10^{-2}$ |

**Table S5.** Apparent rate constants  $k_1$ ,  $k_2$ ,  $k_3$ ,  $k_3^*$ ,  $k_4$  and  $k_4^*$  for formation of the  $\text{Man}_8\text{GlcNAc}_2$ ,  $\text{Man}_7\text{GlcNAc}_2$ ,  $\text{Man}_6/\text{Man}_6^*\text{GlcNAc}_2$  and  $\text{Man}_5\text{GlcNAc}_2$  glycoforms on each glycosylation site by GM I.

| Apparent rate constant        | site 1                        | site 2                        | site 3                        | site 4                                | site 5                        |
|-------------------------------|-------------------------------|-------------------------------|-------------------------------|---------------------------------------|-------------------------------|
| $k_1$ ( $\text{min}^{-1}$ )   | $0.23 \pm 0.03$               | $0.63 \pm 0.41$               | $0.41 \pm 0.07$               | $0.19 \pm 0.02$                       | $0.60 \pm 0.28$               |
| $k_2$ ( $\text{min}^{-1}$ )   | $0.25 \pm 0.04$               | $0.65 \pm 0.36$               | $0.29 \pm 0.04$               | $(2.7 \pm 0.3) \cdot 10^{-2}$         | $0.62 \pm 0.24$               |
| $k_3$ ( $\text{min}^{-1}$ )   | $0.46 \pm 0.11$               | $0.88 \pm 0.80$               | $0.60 \pm 0.18$               | $(0.8 \pm 4.1) \cdot 10^{-2}$         | $0.90 \pm 0.58$               |
| $k_3^*$ ( $\text{min}^{-1}$ ) | $0.13 \pm 0.08$               | $0.48 \pm 0.44$               | $0.17 \pm 0.06$               | $(3.6 \pm 4.4) \cdot 10^{-2}$         | $0.38 \pm 0.25$               |
| $k_4$ ( $\text{min}^{-1}$ )   | $(4.1 \pm 0.7) \cdot 10^{-3}$ | $(1.1 \pm 0.3) \cdot 10^{-2}$ | $(4.7 \pm 0.7) \cdot 10^{-3}$ | $(2.9 \pm 21) \cdot 10^{-2}$          | $(1.4 \pm 0.3) \cdot 10^{-2}$ |
| $k_4^*$ ( $\text{min}^{-1}$ ) | $(0.065 \pm 87) \cdot 10^4$   | $1.6 \pm 3.8$                 | $(0.61 \pm 68) \cdot 10^2$    | $1 \cdot 10^{-8} \pm 8 \cdot 10^{-3}$ | $1.5 \pm 3.3$                 |

**Table S6.** Apparent rate constants  $k_1$  and  $k_2$  for formation of the  $\text{GlcNAcMan}_4\text{GlcNAc}_2$  and  $\text{GlcNAcMan}_3\text{GlcNAc}_2$  glycoforms by GM II on each glycosylation site, respectively.

|                             | site 1          | site 2          | site 3          | site 4                        | site 5          |
|-----------------------------|-----------------|-----------------|-----------------|-------------------------------|-----------------|
| $k_1$ ( $\text{min}^{-1}$ ) | $0.19 \pm 0.01$ | $0.18 \pm 0.01$ | $0.18 \pm 0.02$ | $(7.0 \pm 0.1) \cdot 10^{-3}$ | $0.21 \pm 0.01$ |
| $k_2$ ( $\text{min}^{-1}$ ) | $0.27 \pm 0.03$ | $0.24 \pm 0.03$ | $0.15 \pm 0.02$ | $(2.7 \pm 0.4) \cdot 10^{-3}$ | $0.31 \pm 0.03$ |

**Table S7.** Site specific choice of neighboring glycan and protein residues for the featurization step. Column one labels the considered site/glycan. The second column lists the neighboring glycans and the third column lists the residue indices of amino acids that are considered for the inverse distance featurization.

| Site | Glycan – Glycan | Glycan – Amino Acid                                                      |
|------|-----------------|--------------------------------------------------------------------------|
| 1    | 2, 3, 4         | 32 – 52, 87 – 107, 112 – 162                                             |
| 2    | 1, 4            | 32 – 52, 87 – 107, 112 – 126, 167 – 186, 218 – 232, 245 – 255, 317 – 327 |
| 3    | 1, 4            | 32 – 52, 87 – 107, 127 – 162, 187 – 192, 268 – 285, 345 – 355            |
| 4    | 1, 2, 3         | 32 – 52, 87 – 107, 112 – 192, 218 – 232                                  |
| 5    |                 | 405 – 429, 483 – 504                                                     |

**Table S8.** Amino-acid specific side-chain atoms that were used in hexose-amino acid distance calculations. The first column lists the amino acids and the second column lists the respective side-chain atoms, which were taken for the inverse distance calculation to respective O\_5 hexose atoms.

| Amino Acid          | Side-Chain Atom  |
|---------------------|------------------|
| Arginine (ARG)      | $C_{\zeta}$      |
| Asparagine (ASN)    | $C_{\gamma}$     |
| Aspartic Acid (ASP) | $C_{\gamma}$     |
| Glutamine (GLN)     | $C_{\delta}$     |
| Glutamic Acid (GLU) | $C_{\delta}$     |
| Histidine (HID)     | $C_{\epsilon 1}$ |
| Lysine (LYS)        | $N_{\zeta}$      |
| Serine (SER)        | $O_{\gamma}$     |
| Threonine (THR)     | $O_{\gamma 1}$   |
| Tryptophan (TRP)    | $N_{\epsilon 1}$ |
| Tyrosine (TYR)      | $O_{\eta}$       |

**Table S9.** Related to material and methods. Primers used to generate PDI constructs.

| Purpose                          | Primer name | Sequence 5' to 3'                                              |
|----------------------------------|-------------|----------------------------------------------------------------|
| Removal of "LELQLEHDEL" sequence | prHI_14_fw  | TAA AAG CTT GTC GAG AAG TAC TAG AGG ATC ATA ATC AGC<br>CAT ACC |
|                                  | prHI_15_rev | CAA TTC ATC GTG AAT GGC ATC TTC TTC GTC AGC CAA TTC AG         |

**Table S10.** Related to material and methods. Composition of enzyme activity buffers used for in vitro assays of ER Man I, GM I, GnT I and GM II.

| Name                     | Composition                                              | pH  | Reference                 |
|--------------------------|----------------------------------------------------------|-----|---------------------------|
| ER Man I Activity buffer | 20 mM MES; 150 mM NaCl; 5 mM CaCl <sub>2</sub>           | 6.7 | Aikawa <i>et al.</i> [8]  |
| GM I Activity buffer     | PBS, 0.9 mM CaCl <sub>2</sub> , 0.5 mM MgCl <sub>2</sub> | 7   | This study                |
| GnT I Activity buffer    | 50 mM MES, 150 mM NaCl, 10 mM MnCl <sub>2</sub>          | 6.7 | Geisler <i>et al.</i> [9] |
| GM II Activity buffer    | 50 mM MES, 150 mM NaCl, 10 mM MnCl <sub>2</sub>          | 6.7 | This study                |

**Table S11.** Related to material and methods. Amino acid sequence, expected glycan structures, charge state and mass over charge ratios (*m/z*) of the five tryptic peptides of PDI containing the N-glycosylation sites.

|               | Peptide sequence             | Glycan structure                           | Charge | <i>m/z</i> |
|---------------|------------------------------|--------------------------------------------|--------|------------|
| <b>site 1</b> |                              |                                            |        |            |
|               | NITLAQIDCTENQDLCMEHNIPGFPSLK | Man <sub>9</sub> GlcNAc <sub>2</sub>       | 4      | 1295.7967  |
|               | NITLAQIDCTENQDLCMEHNIPGFPSLK | Man <sub>8</sub> GlcNAc <sub>2</sub>       | 4      | 1255.2814  |
|               | NITLAQIDCTENQDLCMEHNIPGFPSLK | Man <sub>7</sub> GlcNAc <sub>2</sub>       | 4      | 1214.7679  |
|               | NITLAQIDCTENQDLCMEHNIPGFPSLK | Man <sub>6</sub> GlcNAc <sub>2</sub>       | 4      | 1174.2572  |
|               | NITLAQIDCTENQDLCMEHNIPGFPSLK | Man <sub>5</sub> GlcNAc <sub>2</sub>       | 4      | 1133.7435  |
|               | NITLAQIDCTENQDLCMEHNIPGFPSLK | Man <sub>4</sub> GlcNAc <sub>2</sub>       | 4      | 1093.23    |
|               | NITLAQIDCTENQDLCMEHNIPGFPSLK | Man <sub>3</sub> GlcNAc <sub>2</sub>       | 4      | 1052.7254  |
|               | NITLAQIDCTENQDLCMEHNIPGFPSLK | GlcNAcMan <sub>5</sub> GlcNAc <sub>2</sub> | 4      | 1184.5135  |
|               | NITLAQIDCTENQDLCMEHNIPGFPSLK | GlcNAcMan <sub>4</sub> GlcNAc <sub>2</sub> | 4      | 1143.9945  |

|               |                                 |                                            |   |           |
|---------------|---------------------------------|--------------------------------------------|---|-----------|
|               | NITLAQIDCTENQDLCMEHNIPGFPSLK    | GlcNAcMan <sub>3</sub> GlcNAc <sub>2</sub> | 4 | 1103.4802 |
| <b>site 2</b> |                                 |                                            |   |           |
|               | NSDVNNSIDYEGPR                  | Man <sub>9</sub> GlcNAc <sub>2</sub>       | 3 | 1148.7865 |
|               | NSDVNNSIDYEGPR                  | Man <sub>8</sub> GlcNAc <sub>2</sub>       | 3 | 1094.7689 |
|               | NSDVNNSIDYEGPR                  | Man <sub>7</sub> GlcNAc <sub>2</sub>       | 3 | 1040.7494 |
|               | NSDVNNSIDYEGPR                  | Man <sub>6</sub> GlcNAc <sub>2</sub>       | 3 | 986.7343  |
|               | NSDVNNSIDYEGPR                  | Man <sub>5</sub> GlcNAc <sub>2</sub>       | 3 | 932.7157  |
|               | NSDVNNSIDYEGPR                  | Man <sub>4</sub> GlcNAc <sub>2</sub>       | 3 | 878.6966  |
|               | NSDVNNSIDYEGPR                  | Man <sub>3</sub> GlcNAc <sub>2</sub>       | 3 | 824.6952  |
|               | NSDVNNSIDYEGPR                  | GlcNAcMan <sub>5</sub> GlcNAc <sub>2</sub> | 3 | 1000.4126 |
|               | NSDVNNSIDYEGPR                  | GlcNAcMan <sub>4</sub> GlcNAc <sub>2</sub> | 3 | 946.3949  |
|               | NSDVNNSIDYEGPR                  | GlcNAcMan <sub>3</sub> GlcNAc <sub>2</sub> | 3 | 892.3996  |
| <b>site 3</b> |                                 |                                            |   |           |
|               | QSQPAVAVVADLPAYLANETFVTPVIVQSGK | Man <sub>9</sub> GlcNAc <sub>2</sub>       | 4 | 1270.0997 |
|               | QSQPAVAVVADLPAYLANETFVTPVIVQSGK | Man <sub>8</sub> GlcNAc <sub>2</sub>       | 4 | 1229.5882 |
|               | QSQPAVAVVADLPAYLANETFVTPVIVQSGK | Man <sub>7</sub> GlcNAc <sub>2</sub>       | 4 | 1189.0757 |
|               | QSQPAVAVVADLPAYLANETFVTPVIVQSGK | Man <sub>6</sub> GlcNAc <sub>2</sub>       | 4 | 1148.561  |
|               | QSQPAVAVVADLPAYLANETFVTPVIVQSGK | Man <sub>5</sub> GlcNAc <sub>2</sub>       | 4 | 1108.049  |
|               | QSQPAVAVVADLPAYLANETFVTPVIVQSGK | Man <sub>4</sub> GlcNAc <sub>2</sub>       | 4 | 1067.5275 |
|               | QSQPAVAVVADLPAYLANETFVTPVIVQSGK | Man <sub>3</sub> GlcNAc <sub>2</sub>       | 4 | 1027.0229 |
|               | QSQPAVAVVADLPAYLANETFVTPVIVQSGK | GlcNAcMan <sub>5</sub> GlcNAc <sub>2</sub> | 4 | 1158.8162 |
|               | QSQPAVAVVADLPAYLANETFVTPVIVQSGK | GlcNAcMan <sub>4</sub> GlcNAc <sub>2</sub> | 4 | 1118.542  |
|               | QSQPAVAVVADLPAYLANETFVTPVIVQSGK | GlcNAcMan <sub>3</sub> GlcNAc <sub>2</sub> | 4 | 1077.8029 |
| <b>site 4</b> |                                 |                                            |   |           |
|               | IDADFNATFYSMANK                 | Man <sub>9</sub> GlcNAc <sub>2</sub>       | 3 | 1191.478  |
|               | IDADFNATFYSMANK                 | Man <sub>8</sub> GlcNAc <sub>2</sub>       | 3 | 1137.4576 |
|               | IDADFNATFYSMANK                 | Man <sub>7</sub> GlcNAc <sub>2</sub>       | 3 | 1083.4396 |
|               | IDADFNATFYSMANK                 | Man <sub>6</sub> GlcNAc <sub>2</sub>       | 3 | 1029.4253 |
|               | IDADFNATFYSMANK                 | Man <sub>5</sub> GlcNAc <sub>2</sub>       | 3 | 975.407   |
|               | IDADFNATFYSMANK                 | Man <sub>4</sub> GlcNAc <sub>2</sub>       | 3 | 921.389   |
|               | IDADFNATFYSMANK                 | Man <sub>3</sub> GlcNAc <sub>2</sub>       | 3 | 867.3855  |
|               | IDADFNATFYSMANK                 | GlcNAcMan <sub>5</sub> GlcNAc <sub>2</sub> | 3 | 1043.1003 |

|               |                         |                                            |   |           |
|---------------|-------------------------|--------------------------------------------|---|-----------|
|               | IDADFNATFYSMANK         | GlcNAcMan <sub>4</sub> GlcNAc <sub>2</sub> | 3 | 989.0826  |
|               | IDADFNATFYSMANK         | GlcNAcMan <sub>3</sub> GlcNAc <sub>2</sub> | 3 | 935.0586  |
| <b>site 5</b> |                         |                                            |   |           |
|               | LAPTYQELADTYANATSDVLIAK | Man <sub>9</sub> GlcNAc <sub>2</sub>       | 3 | 1444.9727 |
|               | LAPTYQELADTYANATSDVLIAK | Man <sub>8</sub> GlcNAc <sub>2</sub>       | 3 | 1390.9599 |
|               | LAPTYQELADTYANATSDVLIAK | Man <sub>7</sub> GlcNAc <sub>2</sub>       | 3 | 1336.9418 |
|               | LAPTYQELADTYANATSDVLIAK | Man <sub>6</sub> GlcNAc <sub>2</sub>       | 3 | 1282.9224 |
|               | LAPTYQELADTYANATSDVLIAK | Man <sub>5</sub> GlcNAc <sub>2</sub>       | 3 | 1228.9084 |
|               | LAPTYQELADTYANATSDVLIAK | Man <sub>4</sub> GlcNAc <sub>2</sub>       | 3 | 1174.8845 |
|               | LAPTYQELADTYANATSDVLIAK | Man <sub>3</sub> GlcNAc <sub>2</sub>       | 3 | 1120.8772 |
|               | LAPTYQELADTYANATSDVLIAK | GlcNAcMan <sub>5</sub> GlcNAc <sub>2</sub> | 3 | 1296.5946 |
|               | LAPTYQELADTYANATSDVLIAK | GlcNAcMan <sub>4</sub> GlcNAc <sub>2</sub> | 3 | 1242.5693 |
|               | LAPTYQELADTYANATSDVLIAK | GlcNAcMan <sub>3</sub> GlcNAc <sub>2</sub> | 3 | 1188.5502 |

## 4. References

1. Berendsen, H.J.C., D. van der Spoel, and R. Vandrunen, *Gromacs - A Message-Passing Parallel Molecular-Dynamics Implementation*. Computer Physics Communications, 1995. **91**(1-3): p. 43-56.
2. Tribello, G.A., et al., *PLUMED 2: New Feathers for an Old Bird*. Computer Physics Communications, 2014. **185**(2): p. 604-613.
3. Wang, L.L., R.A. Friesner, and B.J. Berne, *Replica Exchange with Solute Scaling: A More Efficient Version of Replica Exchange with Solute Tempering (REST2)*. Journal of Physical Chemistry B, 2011. **115**(30): p. 9431-9438.
4. Hub, J.S., et al., *Quantifying Artifacts in Ewald Simulations of Inhomogeneous Systems with a Net Charge*. Journal of Chemical Theory and Computation, 2014. **10**(1): p. 381-390.
5. Wassenaar, T.A., et al., *SQUEEZE-E: The Optimal Solution for Molecular Simulations with Periodic Boundary Conditions*. Journal of Chemical Theory and Computation, 2012. **8**(10): p. 3618-3627.
6. Jarvis, D.L., *Chapter 14 Baculovirus–Insect Cell Expression Systems*, in *Methods in Enzymology*, R.R. Burgess and M.P. Deutscher, Editors. 2009, Academic Press. p. 191-222.
7. Hang, I., et al., *Analysis of site-specific N-glycan remodeling in the endoplasmic reticulum and the Golgi*. Glycobiology, 2015. **25**(12): p. 1335-1349.
8. Aikawa, J.-i., I. Matsuo, and Y. Ito, *In vitro mannosyl trimming property of human ER  $\alpha$ -1,2 mannosidase I*. Glycoconjugate Journal, 2012. **29**(1): p. 35-45.
9. Geisler, C. and D.L. Jarvis, *Substrate Specificities and Intracellular Distributions of Three N-glycan Processing Enzymes Functioning at a Key Branch Point in the Insect N-Glycosylation Pathway*. Journal of Biological Chemistry, 2012. **287**(10): p. 7084-7097.
